# Supplementary material
Source: PubMed Central journal article supplement (PMC2954371)
Supplement: NIHMS235535-supplement-01.pdf [file NIHMS235535-supplement-01.pdf]

**Table S1. The role of *A. aegypti* homologues in WNV infection, Related to Figure 1.**

| Gene Symbol in man | GenBank No. | Expression at 1 day<br>post WNV infection<br>(Fold/Mock) | Expression at 8 days<br>post WNV infection<br>(Fold/Mock) | WNV burden at 6<br>days (Fold/Mock) | <i>p</i> value  | Description                        |
|--------------------|-------------|----------------------------------------------------------|-----------------------------------------------------------|-------------------------------------|-----------------|------------------------------------|
| ABCB10             | AAEL000434  | 2.2                                                      | 1.2                                                       | 2.16±0.95                           | <i>p</i> <0.005 | Resistance factor <sup>b</sup>     |
| ABCE1              | AAEL010059  | 4.4                                                      | 0.9                                                       | 1.28±0.29                           |                 |                                    |
| ABLIM              | AAEL008358  | 2.1                                                      | 0.9                                                       | 2.17±0.93                           | <i>p</i> <0.005 | Resistance factor                  |
| ACSM3              | AAEL000321  | 3                                                        | 1.8                                                       | 1.02±0.33                           |                 |                                    |
| ADRA1D             | AAEL011844  | 1.7                                                      | 0.9                                                       | 2.13±0.96                           | <i>p</i> <0.05  | Resistance factor                  |
| ANKRD27            | AAEL008819  | 2.8                                                      | 0.8                                                       | 1.50±0.79                           |                 |                                    |
| AP1M1              | AAEL007124  | 2                                                        | 1                                                         | 0.43±0.34                           | <i>p</i> <0.01  | Susceptibility factor <sup>c</sup> |
| AP3S2              | AAEL001405  | 2.1                                                      | 1.1                                                       | 1.93±0.53                           | <i>p</i> <0.01  | Resistance factor                  |
| ATXN7L3            | AAEL004574  | 2                                                        | 1.4                                                       | 0.48±0.46                           | <i>p</i> <0.05  | Susceptibility factor              |
| BCKDHA             | AAEL008366  | 3.3                                                      | 1.4                                                       | 1.30±0.54                           |                 |                                    |
| C18ORF22           | AAEL013615  | 3.3                                                      | 1.1                                                       | 1.88±1.08                           |                 |                                    |
| CLEC4C             | AAEL000283  | 2.6                                                      | 3.5                                                       | N.A. <sup>a</sup>                   |                 |                                    |
| CLECSF6            | AAEL011404  | 1.7                                                      | 0.9                                                       | 1.40±0.42                           |                 |                                    |
| CSNK2A1            | AAEL012094  | 3.7                                                      | 1.1                                                       | 0.36±0.19                           | <i>p</i> <0.01  | Susceptibility factor              |
| CTSE               | AAEL006169  | 3.1                                                      | 1.4                                                       | 2.24±1.74                           |                 |                                    |
| DDX28              | AAEL004456  | 2.3                                                      | 1.4                                                       | 1.27±0.35                           |                 |                                    |
| DERL2              | AAEL008425  | 1.7                                                      | 2                                                         | 1.79±1.12                           |                 |                                    |
| EXOSC9             | AAEL000659  | 2.5                                                      | 1.3                                                       | 1.61±0.63                           |                 |                                    |
| MATN4              | AAEL014547  | 1                                                        | 2.3                                                       | 2.65±0.95                           | <i>p</i> <0.01  | Resistance factor                  |
| MBL2               | AAEL000563  | 4.1                                                      | 3.6                                                       | 0.14±0.15                           | <i>p</i> <0.002 | Susceptibility factor              |

|         |            |     |     |           |                 |                       |
|---------|------------|-----|-----|-----------|-----------------|-----------------------|
| OTUB2   | AAEL007710 | 2   | 1   | 1.40±0.69 |                 |                       |
| PGLYRP3 | AAEL007039 | 0.6 | 0.6 | 0.40±0.11 | <i>p</i> <0.005 | Susceptibility factor |
| PIAS2   | AAEL015099 | 2.1 | 0.9 | 2.17±0.76 | <i>p</i> <0.005 | Resistance factor     |
| PP1201  | AAEL011221 | 2.2 | 1.7 | 1.79±1.33 |                 |                       |
| RPS6KL1 | AAEL011145 | 2.3 | 1.2 | 2.18±1.65 |                 |                       |
| SFXN2   | AAEL009810 | 2.1 | 2.3 | 1.50±0.56 |                 |                       |
| SHC1/2  | AAEL008739 | 2.9 | 0.8 | 0.96±0.92 |                 |                       |
| SOX13   | AAEL005518 | 2   | 1   | 0.99±0.62 |                 |                       |
| TDRD1   | AAEL014694 | 1.9 | 0.5 | N.A.      |                 |                       |
| TRPM3   | AAEL013378 | 2.3 | 1.1 | 2.62±1.42 | <i>p</i> <0.005 | Resistance factor     |
| WDR18   | AAEL014037 | 2.6 | 1.4 | 0.24±0.22 | <i>p</i> <0.005 | Susceptibility factor |
| XYLB    | AAEL010206 | 2   | 1   | N.A.      |                 |                       |

Data were based on 283 proteins that facilitate WNV infection. We measured the expression profile of 215 *A. aegypti* homologues and targeted 32 genes that were significantly influenced by WNV infection using a RNAi screen (shown in the table). Double-strand RNA (dsRNA) was synthesized and microinjected into the mosquito thorax to knock down the target gene. After 3 days post dsRNA microinjection, 10 M.I.D<sub>50</sub> (Mosquito Infective Dose 50%) WNV was injected into the mosquitoes. After 6 days, mosquitoes were sacrificed and the virus burden assessed. Thirteen of the 32 genes, which were silenced, were associated with a significant alternation of the virus burden (*p*<0.05). Statistical analysis was done with the Mann-Whitney test.

<sup>a</sup> NA, gene not analyzed.

<sup>b</sup> Resistance factor for WNV infection.

<sup>c</sup> Susceptibility factor for WNV infection

**Table S2. The expression of the *mosGCTL* family members in adult female *A. aegypti*, Related to Figure 2.**

| <b>mosGCTL subtypes</b> | <b>Expression</b> |
|-------------------------|-------------------|
| AAEL000283              | Yes               |
| AAEL000535              | Yes               |
| AAEL000543              | Yes               |
| AAEL000563              | Yes               |
| AAEL000556              | Yes               |
| AAEL002524              | Yes               |
| AAEL004679              | Yes               |
| AAEL005641              | Yes               |
| AAEL006456              | Yes               |
| AAEL008299              | Yes               |
| AAEL009209              | Yes               |
| AAEL011079              | No                |
| AAEL011402              | No                |
| AAEL011404              | Yes               |
| AAEL011408              | Yes               |
| AAEL011446              | No                |
| AAEL011453              | Yes               |
| AAEL011455              | Yes               |
| AAEL011607              | Yes               |
| AAEL011610              | Yes               |
| AAEL011612              | Yes               |
| AAEL011619              | Yes               |
| AAEL014382              | Yes               |
| AAEL014385              | No                |
| AAEL014390              | Yes               |

**Table S3. *A. aegypti* homologues of human proteins interacting with human *MBL*, Related to Figure 4.**

| Proteins interacting with MBL in man    |              |                       | Homologues in <i>A. aegypti</i>        |                               |
|-----------------------------------------|--------------|-----------------------|----------------------------------------|-------------------------------|
| Name                                    | Abbreviation | Localization          | Gene No.                               | Abbreviation                  |
| Calcitonin receptor                     | CTR          | Cell surface          | AAEL010043                             | mosCTR                        |
| Calreticulin                            | CRTC         | Cell surface          | AAEL011773                             | mosCRTC                       |
| Complement 1q receptor                  | C1q receptor | Cell surface          | None                                   |                               |
| Keratin 1                               | K1           | Cell surface          | None                                   |                               |
| MBL serine protease 2                   | MAP19        | Cell surface          | None                                   |                               |
| Protein tyrosine phosphatase receptor C | PTPRC/CD45   | Cell surface          | AAEL013105<br>AAEL005284               | mosPTP-1<br>mosPTP-2          |
| Sedlin                                  | MIP-2A/SEDL  | Endoplasmic reticulum | AAEL008255                             | mosSEDL                       |
| MBL serine protease 1                   | CRARF/MASP   | Cell surface          | None                                   |                               |
| MAD2 mitotic arrest deficient like 1    | MAD2         | Nucleus               | AAEL008316<br>AAEL015560<br>AAEL013600 | mosMAD2<br>mosIGA1<br>mosIGA2 |
| Integrin alpha2/beta1                   | IGA2/IGB1    | Cell surface          | AAEL011381<br>AAEL014660<br>AAEL012466 | mosIGA3<br>mosIGA4<br>mosIGB  |

This information was obtained from the Human Protein Reference Database (HPRD) (<http://www.hprd.org>).

**Table S4. Primers and probes for Q-PCR, dsRNA synthesis and genes cloning**

| The primers for double-strand RNA synthesis          | Upper primer                                                   | Lower primer                                |                                     |
|------------------------------------------------------|----------------------------------------------------------------|---------------------------------------------|-------------------------------------|
| <i>A. aegypti mosGCTL-1</i>                          | TAATACGACTCACTATAGGGTCCCAGCATTC-GAGCTAACTGG                    | TAATACGACTCACTATAGGGCCTG-CGCAGGTGTTATCATTCC |                                     |
| <i>A. aegypti mosPTP-1</i>                           | TAATACGACTCACTATAGGGAGTGCCCGA-AAGTGGTCAAC                      | TAATACGACTCACTATAGGGCTGC-GAGTGCTCCGAAGGGTAT |                                     |
| <i>C. quinquefasciatus mosGCTL-1</i>                 | TAATACGACTCACTATAGGGAATGCGGCTG-GTCACGATAAAAT                   | TAATACGACTCACTATAGGGACGG-CACCTCCTCGCACAC    |                                     |
| <i>C. quinquefasciatus mosPTP-1</i>                  | TAATACGACTCACTATAGGGATCGTGGCCG-CGTTCACTAAA                     | TAATACGACTCACTATAGGGCGAC-GGCGGTGGGATTTTT    |                                     |
| <i>GFP</i>                                           | TAATACGACTCACTATAGGGGCCGCTACCC-CGACCACAT                       | TAATACGACTCACTATAGGGGGGC-GGACTGGGTGCTCA     |                                     |
| The primers for RT-QPCR                              | Upper primer                                                   | Lower primer                                | Probe (for Taqman QPCR)             |
| <i>A. aegypti mosGCTL-1 for Taqman QPCR</i>          | CGATCGCAGGAGGACAAC                                             | GAAGCTGCAGTTATCGGTAAACTT                    | FAM6-ATGCCGTCGCACGATACGTCCG-TRAMA   |
| <i>WNV E gene</i>                                    | TTCTCGAAGGCGACAGCTG                                            | CCGCCTCCATATTCATCATC                        | FAM6-ATGTCTAAGGACAAGCCTACCATC-TRAMA |
| <i>DENV-2 E gene</i>                                 | CATTCCAAGTGAGAATCTCTTTGTCA                                     | CAGATCTCTGATGAATAACCAACG                    | FAM6-ATGCTGAAACGCGAGAGAAACCGC-TRAMA |
| <i>A. aegypti Actin</i>                              | GAACACCCAGTCTCTGCTGACA                                         | TGCGTCATCTTCTCACGGTTAG                      | FAM6-AGGCCCCGCTCAACCCGAAG-TRAMA     |
| <i>C. quinquefasciatus Actin</i>                     | CCCCCTGAGCGCAAGTACT                                            | CGTCGTATTCCTGCTTGAGAT                       | FAM6-TGGCCTCGCTGTCCACCTTCCA-TRAMA   |
| <i>A. aegypti mosGCTL-1 for SYBR Green QPCR</i>      | GTTCTCGTACATTCATCTCATG                                         | CTTGAACCAGTTAGCTCGAA                        |                                     |
| <i>A. aegypti mosPTP-1</i>                           | CAGGCGCTTCCCGTTAGTGT                                           | TATCCGCGTGAGGCTGGTCT                        |                                     |
| <i>C. quinquefasciatus mosGCTL-1</i>                 | TCAAGAAAACCGCAAACCTGGT                                         | TTTTCGGCTGCGGATTTTATCG                      |                                     |
| <i>C. quinquefasciatus mosPTP-1</i>                  | CGCACGGCTATCCGACCTTCTC                                         | TCGCCCCGTTTCAGTTTCTCTGG                     |                                     |
| <i>D. melanogaster Actin</i>                         | CCCAAGGCCAACCGTGAGAA                                           | CGGAGGCGTACAGCGAGAGC                        |                                     |
| The primers for genes cloning                        | Upper primer                                                   | Lower primer                                |                                     |
| <i>mosPTP-1-Ex</i> (plus HA tag in the N-terminal)   | TCTGACCATGGTACCCATACGATGTTCCAG-ATTACGCTCTTACTGTCAATCTAACCGAATC | TCTGAGAATTCTCACAGATTGTAAT-CATCGTACAC        |                                     |
| <i>mosPTP-1</i> (plus HA tag in the N-terminal)      | TCTGACCATGGTACCCATACGATGTTCCAG-ATTACGCTCTTACTGTCAATCTAACCGAATC | TCTGAGAATTCTCAGTCAATGTTGT-TCACAAGTC         |                                     |
| <i>mosGCTL-1</i> cloned into pMT/BiP/V5-His A vector | TCTGAAGATCTGATTCTACGCCAAATCGAA                                 | TCTGACTCGAGAAACGGTTGCACA-CAATCAC            |                                     |
